# Supplementary material
Source: publisher figshare collection journal article supplement (https://acs.figshare.com/ndownloader/files/14284742)

## SUPPORTING INFORMATION

### **A Zwitterionic Polymerizable Surfactant from $\omega$ -Hydroxyl Tetradecanoic Acid Provides Stimuli Responsive Behavior**

Jing Hu,<sup>†</sup> Connor Sanders<sup>‡</sup>, Shekar Mekala,<sup>§,¥</sup> Tzu-Yin Chen,<sup>†</sup> Fei Liu,<sup>§</sup> Michael F.  
Cunningham,<sup>\*,‡</sup> and Richard A. Gross<sup>\*,§</sup>

<sup>†</sup>Department of Chemical and Biomolecular Engineering, Tandon School of Engineering, New  
York University, Six Metrotech Center, Brooklyn, New York 11201, United States.

<sup>‡</sup>Department of Chemical Engineering, Queen's University, Kingston, Ontario, Canada K7L  
3N6

<sup>§</sup>Department of Chemistry and Biology, Center for Biotechnology and Interdisciplinary  
Studies, Rensselaer Polytechnic Institute (RPI), 1623 15<sup>th</sup> St, Troy, NY 12180, United States

<sup>¥</sup>Present Address: Chemical Biology Program, Memorial Sloan Kettering Cancer  
Center, 1275 York Avenue, New York, NY 10065, United States

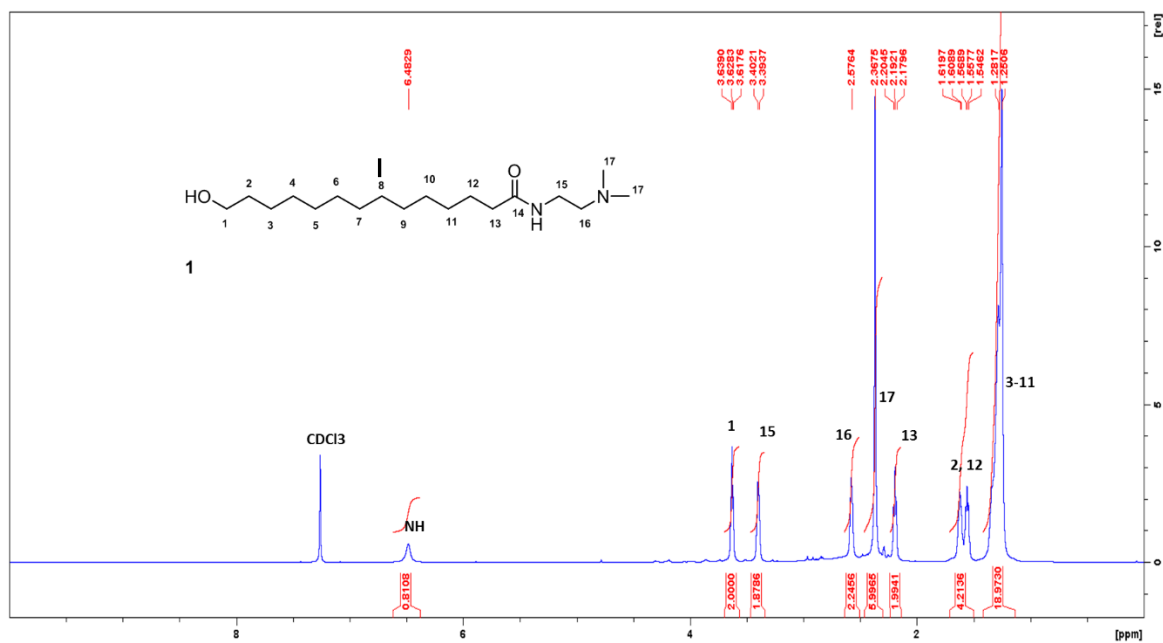

**Figure S-1.** <sup>1</sup>H-NMR spectrum of  $\omega$ -hydroxyl- $\alpha$ -2-dimethylaminoethyl tetradecanamide **1**.

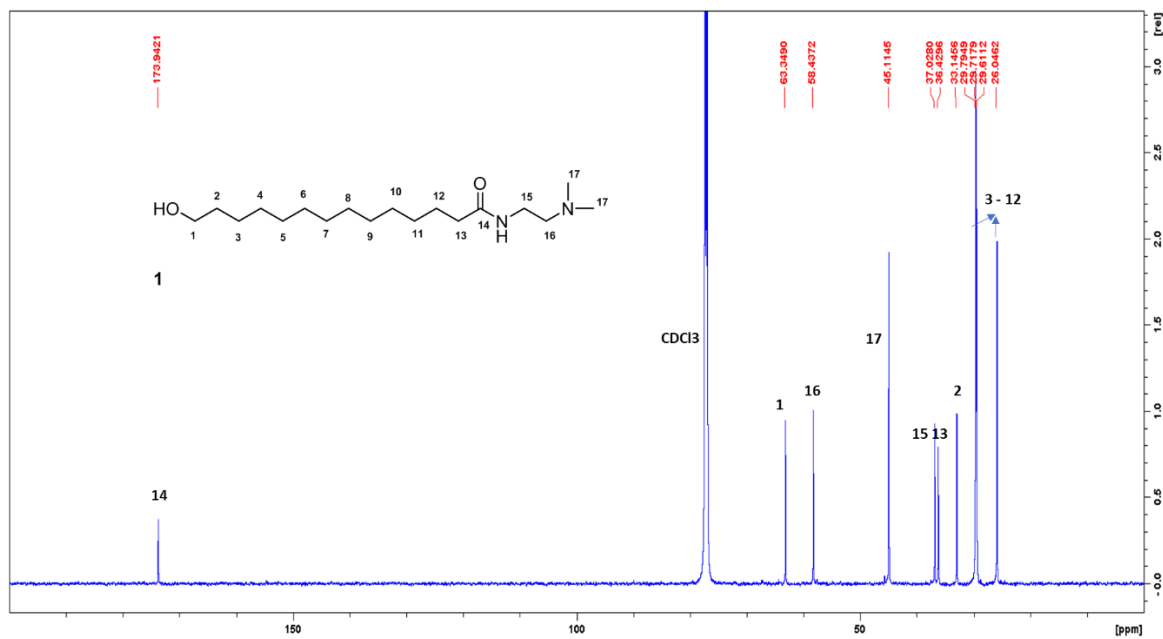

**Figure S-2.** <sup>13</sup>C-NMR spectrum of  $\omega$ -hydroxyl- $\alpha$ -2-dimethylaminoethyl tetradecanamide **1**.

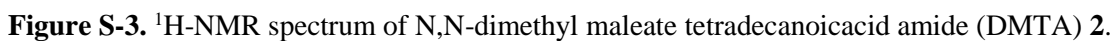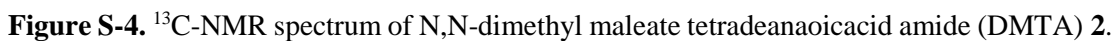

Supplement: Supplementary file 1 [file 14284742]
